# Supplementary material for: N-glycosylation Triggers a Dual Selection Pressure in Eukaryotic Secretory Proteins
Source: PubMed Central journal article supplement (PMC5562741; doi:10.1038/s41598-017-09173-6), 2017-08-18
Supplement: 41598_2017_9173_MOESM1_ESM.pdf [file 41598_2017_9173_MOESM1_ESM.pdf]

## Supplementary Information

# ***N*-glycosylation Triggers a Dual Selection Pressure in Eukaryotic Secretory Proteins**

**Máximo Lopez Medus<sup>1,\*</sup>, Gabriela E. Gomez<sup>2,\*</sup>, Lucía F. Zacchi<sup>3,\*†</sup>, Paula M. Couto<sup>1,\*</sup>, Carlos A. Labriola<sup>1</sup>, María S. Labanda<sup>1</sup>, Rodrigo Corti Bielsa<sup>1</sup>, Eugenia M. Clérico<sup>4</sup>, Benjamin L. Schulz<sup>3</sup> & Julio J. Caramelo<sup>1,5</sup>**

<sup>1</sup>Fundación Instituto Leloir and Instituto de Investigaciones Bioquímicas de Buenos Aires (IIBBA-CONICET), 1405 Buenos Aires, Argentina. <sup>2</sup>Universidad de Buenos Aires. CONICET. Facultad de Farmacia y Bioquímica. Departamento de Química Biológica. Instituto de Química y Físicoquímica Biológicas (IQIFIB), 1113 Buenos Aires, Argentina. <sup>3</sup>School of Chemistry and Molecular Biosciences, The University of Queensland, QLD 4072, Australia. <sup>4</sup>Department of Biochemistry and Molecular Biology, Life Sciences Laboratories, University of Massachusetts, Amherst MA 01003, USA. <sup>5</sup>Universidad de Buenos Aires. Facultad de Ciencias Exactas y Naturales. Departamento de Química Biológica, 1428 Buenos Aires, Argentina. <sup>†</sup>Present address: ARC Training Centre for Biopharmaceutical Innovation, The University of Queensland, St. Lucia, QLD 4072, Australia. \*These authors contributed equally to this work. Correspondence and requests for materials should be addressed to J.J.C. (email: jcaramelo@leloir.org.ar)

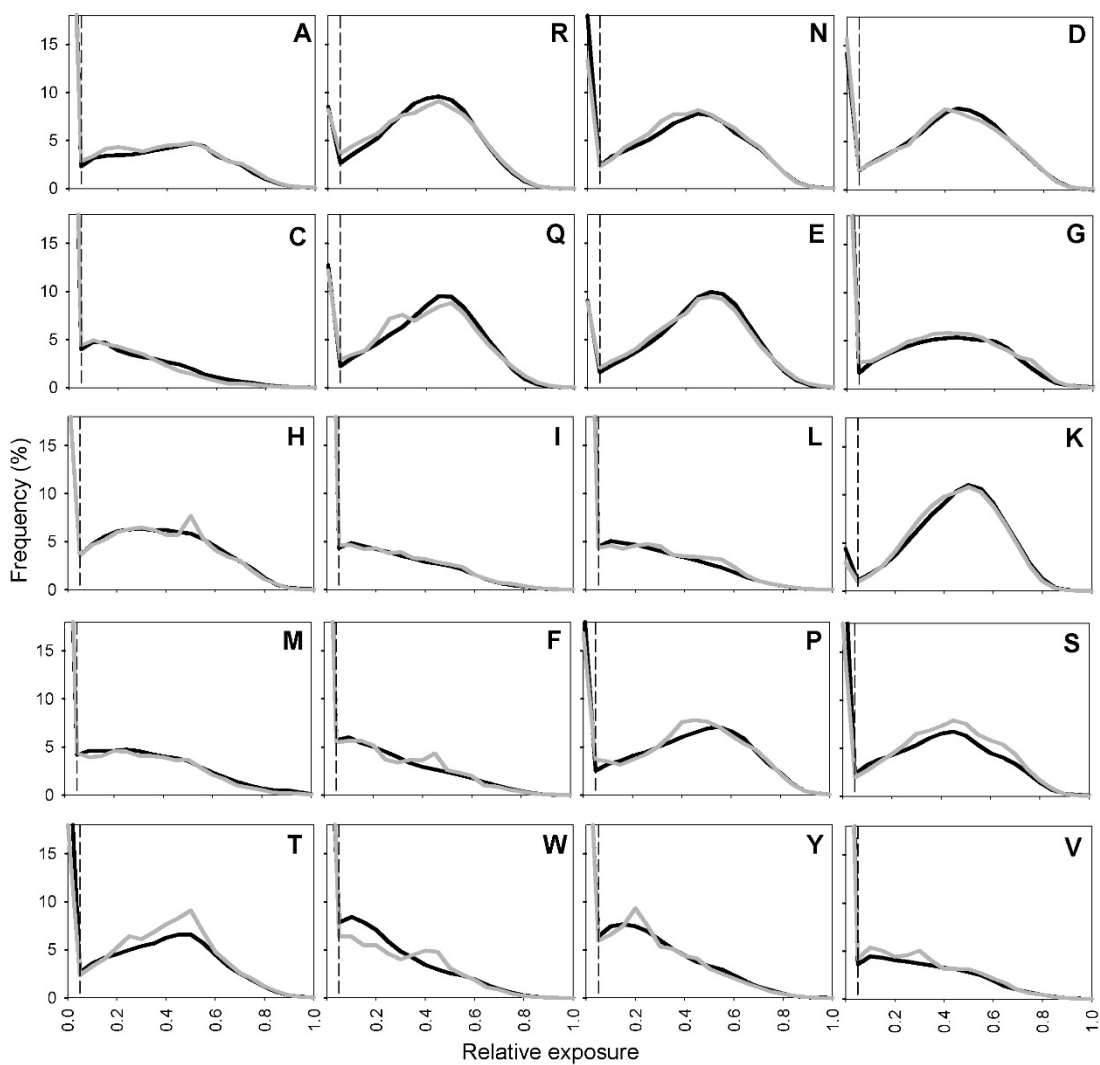

**Figure S1. Relative exposure curves for the 20 amino acid residues using a 3 Å radius probe.** Curves for residues belonging to non secretory-pathway (NSP) and secretory pathway (SP) proteins are in black and gray, respectively. Dashed lines indicate the cut off value of relative exposure (5%) below which a residue is considered buried.

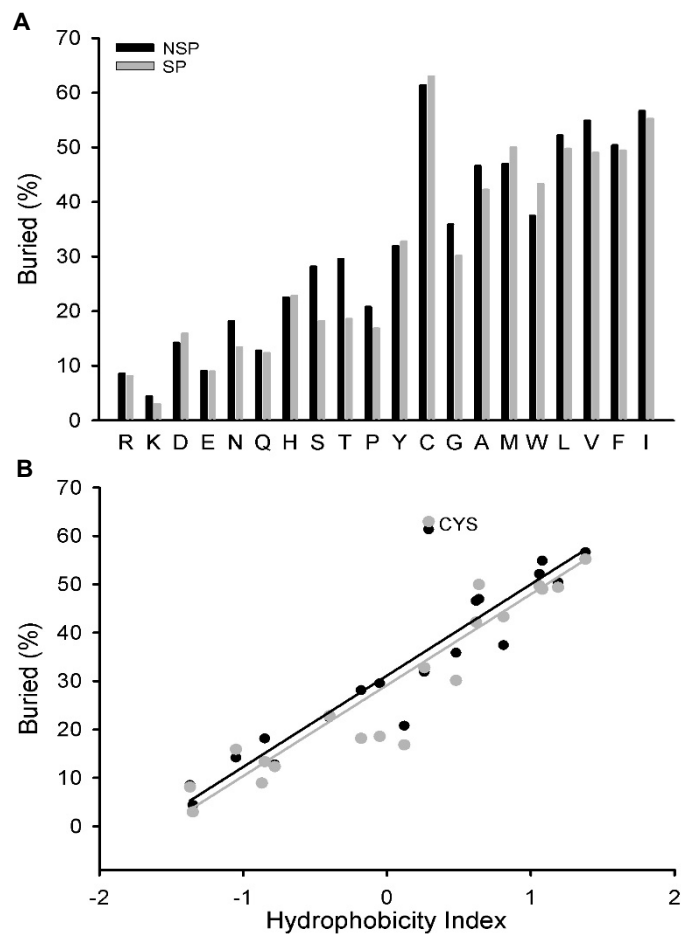

**Figure S2. The proportion of buried residues is similar for secretory and non-secretory pathway proteins. (A)** Proportion of buried residues in NSP (black bars) and SP (gray bars) proteins. These values are the frequency of residues corresponding to zero relative exposure shown in Figure 3-figure supplement 1. **(B)** Correlation between the proportion of hidden residues and the hydrophobicity index of Fauchere-Pliska (octanol-water partition constant)<sup>1</sup>.

**Table S1. Buried Asn in the tripeptides Asn-X-Ser and Asn-X-Thr in SP proteins.** Factors that impair glycosylation by OST are highlighted in red: specific residues at +1 and +3, distances to C-terminal end lower than 60 residues, and short distances to transmembrane segments.

|                  | PDB_chain | UNIPROT | Position | Sequon      | Distance to C-terminal | Distance to TM |
|------------------|-----------|---------|----------|-------------|------------------------|----------------|
| <b>Ser at +2</b> | 1ck7_A    | P08253  | 573      | NWSK        | 87                     |                |
|                  | 1eg1_A    | P07981  | 164      | NGSL        | 295                    |                |
|                  | 1eg1_A    | P07981  | 208      | NTSH        | 251                    |                |
|                  | 1evu_A    | P00488  | 542      | NNSH        | 190                    |                |
|                  | 1evu_A    | P00488  | 18       | NNSN        | 714                    |                |
|                  | 1gw0_A    | Q70KY3  | 281      | NTST        | 342                    |                |
|                  | 1h0p_A    | P52013  | 133      | NGSQ        | 71                     |                |
|                  | 1kqr_A    | P12473  | 132      | NASQ        | 644                    |                |
|                  | 1ll1_A    | P04253  | 449      | NNSA        | 179                    |                |
|                  | 1rmg_A    | Q00001  | 235      | NWSG        | 205                    |                |
|                  | 1tzt_A    | Q8J136  | 151      | NLSG        | 472                    |                |
|                  | 1uey_A    | Q92823  | 716      | NYSF        | 588                    |                |
|                  | 2i2s_A    | P0C6Y8  | 132      | NTSQ        | 644                    |                |
|                  | 2l3o_A    | P01586  | 77       | NLSK        | 89                     |                |
|                  | 2np1_X    | P78310  | 201      | NASS        | 164                    |                |
|                  | 2wr0_A    | D0VWP8  | 180      | NTSG        | 329                    |                |
|                  | 2x2h_A    | Q9STC1  | 492      | NRSV        | 596                    |                |
|                  | 2x2h_A    | Q9STC1  | 342      | NVSQ        | 746                    |                |
|                  | 2x2h_A    | Q9STC1  | 734      | NMSC        | 354                    |                |
|                  | 3a64_A    | B7X9Z2  | 253      | NVSN        | 150                    |                |
|                  | 3d66_A    | Q96IY4  | 241      | NRSF        | 182                    |                |
|                  | 3dgv_A    | Q2KIG3  | 241      | NRSL        | 182                    |                |
|                  | 3ich_A    | P23284  | 148      | NGSQ        | 68                     |                |
|                  | 3ixv_A    | P80476  | 446      | NNSG        | 180                    |                |
|                  | 3pps_A    | F6N9E7  | 272      | NTST        | 332                    |                |
|                  | 1sqj_A    | Q8J0D2  | 754      | NYSG        | <b>58</b>              |                |
|                  | 2d39_A    | O00602  | 305      | NWSA        | <b>21</b>              |                |
|                  | 2isn_A    | A8D1K3  | 486      | NISV        | <b>52</b>              |                |
|                  | 2v3d_A    | P04062  | 501      | NRSS        | <b>35</b>              |                |
|                  | 3q31_A    | Q2TWF5  | 226      | NLST        | <b>48</b>              |                |
|                  | 2z73_A    | P31356  | 185      | NCSF        | 263                    | <b>10</b>      |
|                  | 2ks9_A    | P25103  | 18       | NTSE        | 389                    | <b>13</b>      |
|                  | 1gzm_A    | P02699  | 200      | NESE        | 148                    | <b>2</b>       |
|                  | 2dwr_A    | P11193  | 132      | <b>NDSN</b> | 643                    |                |
|                  | 1shn_A    | Q9BHT8  | 163      | <b>NDSN</b> | 312                    |                |
|                  | 1ie4_A    | P02767  | 118      | <b>NDSG</b> | <b>29</b>              |                |
|                  | 1tfp_A    | P27731  | 121      | <b>NDSG</b> | <b>29</b>              |                |
|                  | 2qpf_A    | P07309  | 118      | <b>NDSG</b> | <b>29</b>              |                |
|                  | 3qml_C    | Q08199  | 233      | <b>NDSN</b> | 188                    |                |
|                  | 1h1n_A    | Q8TG26  | 40       | NESE        | 295                    |                |
|                  | 1iaz_A    | P61914  | 74       | NESE        | 140                    |                |
|                  | 2aen_A    | P11196  | 132      | <b>NNSD</b> | 643                    |                |
|                  | 2atm_A    | P49370  | 187      | <b>NMSP</b> | 144                    |                |
|                  | 2xkl_A    | Q9Z1R3  | 150      | <b>NRSP</b> | <b>40</b>              |                |
|                  | 3i6s_A    | O82777  | 327      | <b>NGSP</b> | 434                    |                |
| Pro at +1        | 1dhk_B    | P02873  | 175      | <b>NPST</b> | 71                     |                |
| Pro at +1        | 1hwm_B    | Q9AVR2  | 398      | <b>NPSS</b> | 166                    |                |
| Pro at +1        | 1kdg_A    | Q01738  | 535      | <b>NPSI</b> | 238                    |                |
| Pro at +1        | 2bb5_A    | P20062  | 51       | <b>NPSI</b> | 376                    |                |
| Pro at +1        | 2bb6_A    | Q9XSC9  | 51       | <b>NPSI</b> | 381                    |                |
| Pro at +1        | 2cnj_D    | P11717  | 1520     | <b>NPST</b> | 971                    |                |
| Pro at +1        | 2id4_A    | P13134  | 146      | <b>NPSF</b> | 668                    |                |
| Pro at +1        | 2pmv_A    | P27352  | 54       | <b>NPSI</b> | 363                    |                |

|                        |        |        |      |      |      |
|------------------------|--------|--------|------|------|------|
| Pro at +1              | 2z73_A | P31356 | 14   | NPSI | 434  |
| Pro at +1              | 3c9z_A | P33183 | 397  | NPSS | 166  |
| Pro at +1              | 3j0a_A | O60602 | 472  | NPSL | 386  |
| <i>N</i> -glycosylated | 2i6q_A | Q53HP3 | 447  | NMSA | 285  |
| <b>Thr at +2</b>       |        |        |      |      |      |
|                        | 1s2b_A | P15369 | 161  | NLTT | 99   |
|                        | 1sli_A | Q27701 | 232  | NVTL | 530  |
|                        | 1y43_B | P24665 | 190  | NLTT | 92   |
|                        | 2feb_A | P08519 | 3969 | NLTR | 579  |
|                        | 2x2h_A | Q9STC1 | 716  | NSTT | 372  |
|                        | 2x2h_A | Q9STC1 | 509  | NITC | 579  |
|                        | 3og2_A | Q70SY0 | 810  | NWTT | 213  |
|                        | 1oc5_A | Q9C1S9 | 431  | NGTS | 45   |
|                        | 2cl2_A | Q874E3 | 270  | NLTF | 48   |
|                        | 3kdp_B | P05027 | 265  | NLTM | 38   |
|                        | 2ks9_A | P25103 | 89   | NFTY | 318  |
|                        | 1eub_A | P45452 | 124  | NYTP | 347  |
|                        | 1fcq_A | Q08169 | 223  | NLTP | 159  |
| Pro at +1              | 1bvp_1 | P69361 | 235  | NPTQ | 114  |
| Pro at +1              | 1lnl_A | P83040 | 267  | NPTT | 146  |
| Pro at +1              | 1n9e_A | Q96X16 | 464  | NPTL | 323  |
| Pro at +1              | 1orv_A | P22411 | 263  | NPTV | 503  |
| Pro at +1              | 1tzi_A | Q8J136 | 593  | NPTL | 30   |
| Pro at +1              | 2gbc_A | P14740 | 261  | NPTV | 506  |
| Pro at +1              | 2kgl_A | Q9ERE7 | 114  | NPTE | 110  |
| Pro at +1              | 2qt9_A | P27487 | 263  | NPTV | 503  |
| Pro at +1              | 2xcy_A | Q4WQS0 | 124  | NPTP | 282  |
| Pro at +1              | 3nsm_A | Q06GJ0 | 335  | NPTK | 259  |
| <i>N</i> -glycosylated | 1gw0_A | Q70KY3 | 88   | NGTS | 485  |
| <i>N</i> -glycosylated | 1gw0_A | Q70KY3 | 289  | NVTF | 284  |
| <i>N</i> -glycosylated | 1nd5_A | P15309 | 301  | NETQ | 53   |
| <i>N</i> -glycosylated | 1umz_A | Q8GZD5 | 93   | NRTG | 179  |
| <i>N</i> -glycosylated | 2v5r_A | Q0E9K4 | 18   | NSTG | 1978 |
| <i>N</i> -glycosylated | 3pps_A | F6N9E7 | 89   | NGTS | 475  |
| <i>N</i> -glycosylated | 3pps_A | F6N9E7 | 290  | NVTF | 274  |
| <i>N</i> -glycosylated | 3qwq_A | P00533 | 328  | NATN | 858  |

2

**Table S2. Buried Asn in the tripeptides Asn-X-Ser and Asn-X-Thr at the protein-protein interfaces of SP proteins.** Residues at +1 and +3 sites that are suboptimal, and distances to C-terminal end lower than 60 residues are highlighted in red.

|                  | PDB_chain | UNIPROT | Position | Sequon      | Distance to C-terminal | Comments                                                       |
|------------------|-----------|---------|----------|-------------|------------------------|----------------------------------------------------------------|
| <b>Ser at +2</b> |           |         |          |             |                        |                                                                |
|                  | 2gk2_A    | P13688  | 104      | NASL        | 422                    |                                                                |
|                  | 1osg_A    | Q9Y275  | 242      | NNSC        | <b>43</b>              |                                                                |
|                  | 1tzt_A    | Q8J136  | 140      | NGSN        | 483                    |                                                                |
|                  | 1a0j_A    | P35033  | 138      | NLSG        | 100                    |                                                                |
|                  | 3k6s_A    | P20702  | 1050     | NLSF        | 113                    |                                                                |
|                  | 1scf_A    | P21583  | 97       | NYSI        | 176                    |                                                                |
|                  | 2o26_A    | P20826  | 97       | NYSI        | 176                    |                                                                |
|                  | 2id5_A    | Q96FE5  | 505      | <b>NDSM</b> | 115                    |                                                                |
| Pro at +1        | 1cf8_H    | A2NUE8  | 61       | <b>NPSL</b> | 157                    |                                                                |
| Pro at +1        | 1ezv_X    |         | 61*      | <b>NPSL</b> | 66*                    | Non physiological immunocomplex                                |
| Pro at +1        | 1i9r_H    |         | 52*      | <b>NPSN</b> | 167*                   | Non physiological immunocomplex                                |
| Pro at +1        | 1xu7_A    | P28845  | 270      | <b>NPSR</b> | <b>22</b>              |                                                                |
| Pro at +1        | 3uaj_H    |         | 60*      | <b>NPSL</b> | 176*                   | Non physiological immunocomplex                                |
| <b>Thr at +2</b> |           |         |          |             |                        |                                                                |
|                  | 1cn1_A    | P02866  | 118*     | NSTH        | 119*                   | Sequon generated after post-translational polypeptide ligation |
|                  | 1dqt_A    | P09793  | 113      | NLTI        | 110                    |                                                                |
|                  | 1t8u_A    | Q9Y663  | 344      | NKTK        | <b>62</b>              |                                                                |
|                  | 1xed_A    | P01833  | 83       | NLTN        | 681                    |                                                                |
|                  | 1zgj_P    |         | 53*      | <b>NETQ</b> | 196*                   | Non natural quimeric protein                                   |
| Pro at +1        | 1akj_D    | P01732  | 49       | <b>NPTS</b> | 186                    |                                                                |
| Pro at +1        | 1kdg_A    | Q01738  | 510      | <b>NPTA</b> | 263                    |                                                                |

\*derived from the sequence in the PDB file

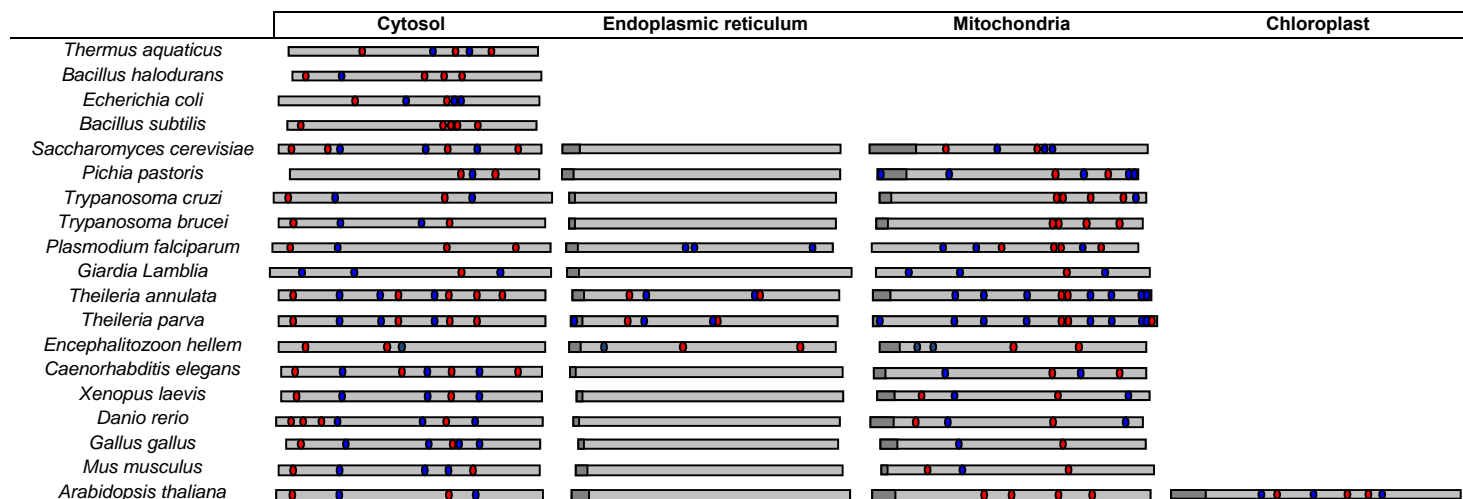

**Figure S3. Location of potential sequons in Hsp70s in diverse cellular compartments from selected organisms.**

The positions of sequons Asn-X-Ser and Asn-X-Thr are indicated as blue and red circles, respectively. Export signal and transit peptides are marked in dark gray.

```

SSA1 -----MSKAVGIDLGTT 12
SSA4 -----MSKAVGIDLGTT 12
KAR2 MFFNRLSAGKLLVPLSVVLYALFVVILPLQNSFHSSNVLVRGADDVENYGTVIGIDLGTT 60
      ...:*****

SSA1 YSCVAHFANDRVDIIANDQGNRTTPSFVAFTDTERLIGDAAKNQAAMNPSNTVFDKRLI 72
SSA4 YSCVAHFANDRVEIIANDQGNRTTPSYVAFTDTERLIGDAAKNQAAMNPHNTVFDKRLI 72
KAR2 YSCVAVMKNGKTEILANEQGNRI TPSYVAFTDTERLIGDAAKNQVAANPQNTIFDIKRLI 120
      ***** : *.:*:***:***** ***:***** *****.* ** ***:** *****

SSA1 GRNFNDPEVQADMKHFPFKFLIDVDGKPKQIQVEFKGETKNFTPEQISSMVLGKMKETAESY 132
SSA4 GRKFDDPEVTNDAKHYPFKVIDKGGKPVVQVEYKGETKTFTPEEISSMILTKMKETAENF 132
KAR2 GLKYNDRSVTKDIKHLFPFNVVNKDGKPAVEVSVKGEKKVFTPEEISGMILGKMKQIAEDY 180
      * :.:* . * * * * :.:* * * * :.:* * * * . * * * * :.:* * * * : *.:

SSA1 LGAKVNDAVVTVPAYFNDSQRQATKDAGTIAGLNVLRINEPTAAAIAAYGLDKKKEEH- 191
SSA4 LGTEVKDAVVTVPAYFNDSQRQATKDAGTIAGLNVLRINEPTAAAIAAYGLDKKSQKEHN 192
KAR2 LGTKVTHAVVTVPAYFNDAQRQATKDAGTIAGLNVLRIVNEPTAAAIAAYGLDK-SDKEHQ 239
      **.:* . *****:*****:*****:***** ..:**

SSA1 VLI FDLGGGTFDVSLLSIEDGIFEVKATAGDTHLGGEDFDNRLVNHFIQEFKRKNKKDLS 251
SSA4 VLI FDLGGGTFDVSLLSIDEVGFVKATAGDTHLGGEDFDSRLVNF LAEEFKRKNKKDLT 252
KAR2 IIVYDLGGGTFDVSLLSIEGVFVQATSGDTHLGGEDFDYKIVRQLIKAFKKKHGIDVS 299
      :.:* *****:***:***:***** :.* : : **:* *.:

SSA1 TNQRALRRLRTACERAKRTLSSSAQTSVEIDSLFEGIDFYTSITRARFEELCADLFRSTL 311
SSA4 TNQRSLRRLRTAAERAKRTLSSSAQTSIEIDSLFEGIDFYTSITRARFEELCADLFRSTL 312
KAR2 DNNKALAKLKREAEKAKRALSSQMSTRIEIDSFVDGIDLSETLTRAKFEELNLDLFKKT 359
      *.:* :.: *.:***:*** . * :*****:***: :***:*** ***:**

SSA1 DPVEKVL RDAKLDKSKQVDEIVLVGGSTRIPKVQKLVTDYFNGKEPNRSINPDEAVAYGAA 371
SSA4 EPVEKVLADSKLDKSIDIVLVGGSTRIPKVQKLVSDFFNGKEPNRSINPDEAVAYGAA 372
KAR2 KPVEKVLQDSGLEKDVDDIVLVGGSTRIPKVQQLLESYFDGKKA SKGINPDEAVAYGAA 419
      .***** * : *.:*:*****:***: *.:**:*:..*****

SSA1 VQAAILTGDESSKTQDLLLDDVAPLSLGIETAGGVMTKLIPRNSTIPTKKSEIFSTYADN 431
SSA4 VQAAILTGQSSSTQDLLLDDVAPLSLGIETAGGIMTKLIPRNSTIPTKKSEVFSTYADN 432
KAR2 VQAGVLSGEEG--VEDIVLLDVNALTGLGIETTGGVMTPLIKRNTA IPTKKSQIFSTAVDN 477
      ***.:* :.:* . :*:*** .*:*****:*** ** ***:*****:*** .**

SSA1 QPGVLIQVFEGERA KTKDNNLLGKFELSGIPPAPRGVPQIEVTFDVSNGILNVS AVEKG 491
SSA4 QPGVLIQVFEGERTKTKDNNLLGKFELSGIPPAPRGVPQIEVTFDIDANGILNVS AVEKG 492
KAR2 QPTVMIKVYEGERAMSKDNNLLGKFELTGIPPAPRGVPQIEVTFALDANGILKVSATDKG 537
      ** *.:* :*:***: :*****:*****:*****:***:***:***:***

SSA1 TGKSNKITITNDKGRLSKEDIK MVAEAEKFKAEDEKESQRIASKNQLESIA YSLKNTIS 551
SSA4 TGKSNKITITNDKGRLSKEDIK MVAEAEKFKAEDEQEAQRVQAKNQLESYAFTLKN SVS 552
KAR2 TGKSESITITNDKGRLTQEEIDRMV EAEKFA SEDASIKAKVESRNKLENYA HSLKNQVN 597
      *****:*****:***:*** ***** ** . :.:***. *.:*** .:

SSA1 EAG--DKLEQADKDTVTKKAETISWLD SN-TTASKEEFDDKLELQDIANPIMSKLY-Q 607
SSA4 ENNFKEKVG EEDARKLEAAAQDAINWLDAS-QAASTEYKERQKELEGVANPIMSKFYGA 611
KAR2 GDLG-EKLEEDKETLLDAANDVLEWLDNDFETAIAEDFDEKFE SLSKVAYPITSKLY-- 654
      :*: * . : *.:* . * * :.:* . * * * :*

SSA1 AGGAPGGAAGGAPGGFPGGAPPAPAEAGPTVEEVD- 642
SSA4 AGGAPG--AGPVPG--AGAGPTGAPDNGPTVEEVD- 642
KAR2 -GGADGSGAADYDD-----EDED DDGDYFEHDEL 682
      *** * * . : * * . :

```

**Figure S4. Sequence alignment of *Saccharomyces cerevisiae* Hsp70s.** Sequons in the cytosolic homologues Ssa1 and Ssa4 are indicated in yellow. Alignment was performed with CLUSTALW<sup>2</sup>.



**Table S3.** Sequons in the cytosolic Hsp70s Ssa1 and Ssa4, their aligned sequence in Kar2 and the sequons introduced in Kar2.

| <b>Mutant</b> | <b>Kar2</b> | <b>Ssa1</b> | <b>Ssa4</b> | <b>Sequon</b> |
|---------------|-------------|-------------|-------------|---------------|
| 1             | 80-GNRIT    | 32-GNRIT    | 32-GNRIT    | 80-GNRIT      |
| 2             | 158-KVFTP   | 110-KNFTP   | 110-KTFTP   | 158-KNFTP     |
| 3             | 196-FNDAQ   | 148-FNDSQ   | 148-FNDSQ   | 196-FNDTQ     |
| 4             | 404-ASKGI   | 356-PNRSI   | 357-PNRSI   | 404-ANKTI     |
| 5             | 459-RNTAI   | 413-RNSTI   | 414-RNSTI   | 459-RNITI     |
| 6             | 529-LKVSA   | 483-LNVSA   | 484-LNVSA   | 529-LNVTI     |
| 7             | 625-DNFET   | 578-SNTTA   | 581-ASQAA   | 625-DNFET     |

**Table S4.** Primers used for BiP N-glycosylation study.

| Name   | Sequence 5' to 3'                                 | Reference  |
|--------|---------------------------------------------------|------------|
| JJC228 | GTGAAGTTCGAGAACGACACCCTGGTGAAC                    | This study |
| JJC229 | GTTCAACAGGGTGTGTTCTCGAACTTAC                      | This study |
| JJC230 | GTGAAGTTCGAGAACGACTCCCTGGTGAAC                    | This study |
| JJC231 | GTTCAACAGGGAGTCGTTCTCGAACTTAC                     | This study |
| JJC232 | CATCGACTTCAACGAGACCGGCAACATCCTG                   | This study |
| JJC233 | CAGGATGTTGCCGGTCTCGTTGAAGTCGATG                   | This study |
| JJC234 | CATCGACTTCAACGAGTCCGGCAACATCCTG                   | This study |
| JJC235 | CATCGACTTCAACGAGTCCGGCAACATCCTG                   | This study |
| JJC236 | GAACACCCCATCAACGACACCCCGTGCTG                     | This study |
| JJC237 | CAGCACGGGGTGTCTGTGATGGGGGTGTTT                    | This study |
| JJC238 | GAACACCCCATCAACGACTCCCGTGCTG                      | This study |
| JJC239 | CAGCACGGGGAGTCGTTGATGGGGGTGTTT                    | This study |
| JJC340 | GGCAACAACAAGACCCGCGC                              | This study |
| JJC341 | GCGCGGTCTTGTGTTGCC                                | This study |
| JJC344 | CTGGTGAACCGCACCGAGCTG                             | This study |
| JJC345 | CAGCTCGTGGGTTACCAG                                | This study |
| LZBS15 | AAGGAATGGATCCCATGAACTCAGCATGTGCTACTCC             | This study |
| LZBS16 | AAGGAATGAGCTCAATTGCATTTGCGCAATAGAGC               | This study |
| LZBS20 | ttccagattacgctCACGACGAATTGTAGATAAAATAG            | This study |
| LZBS21 | catcgtatgggtaTTCGAAATAATCACCATCGTC                | This study |
| JJC558 | GCTAATGAGCAAGGTAACAGAACTACCCCATCTTACGTGGCATTACC   | This study |
| JJC559 | GGTGAATGCCACGTAAGATGGGGTAgTCTGTACCTTGCTCATTAGC    | This study |
| JJC562 | CCTGCTATTTCAATGACactCAAAGACAAGCCACCAAGG           | This study |
| JJC563 | CCTTGGTGGCTTGTCTTTGagTGCATTGAAATAAGCAGG           | This study |
| JJC564 | CATACTTGTGGTAAGAAGGCCaacAAGactATTAACCCAGATGAAGC   | This study |
| JJC565 | GCTTCATCTGGGTTAATAgTCTTgttGGCCTTCTTACCATCAAAGTATG | This study |
| JJC566 | CTCCATTAATTAAGAGAAATACTactATTCTACAAAGAAATCCC      | This study |
| JJC567 | GGGATTTCTTTGTAGGAATagTAgTATTTCTTAATTAATGGAG       | This study |
| JJC568 | GACGCTAATGGTATTCTGaatGTGactGCCACAGATAAGGGAACTG    | This study |
| JJC569 | CAGTCCCTTATCTGTGGCagTCAcattCAGAATACCATTAGCGTC     | This study |
| JJC570 | GGTTAGATGATAACTTTacaACCGCCATTGCTGAAGACTTTG        | This study |
| JJC571 | CAAAGTCTTCAGCAATGGCGGTgtTAAAGTTATCATCTAAC         | This study |
| JJC643 | CTTCTTTCTCCTTTGACACTTACTTCTACAGC                  | This study |
| JJC644 | aatTTTACTCCAGAAGAAATTTCTGGTATGATCTTGG             | This study |
| LZBS26 | GCTAATGAGCAAGGTcaaAGAAactACCCCATCTTACGTGGCATTACC  | This study |
| LZBS27 | GGTGAATGCCACGTAAGATGGGGTAgTCTttgACCTTGCTCATTAGC   | This study |
| LZBS28 | CCTGCTTATTTcGaaGACactCAAAGACAAGCCACCAAGG          | This study |
| LZBS29 | CCTTGGTGGCTTGTCTTTGagTGTcttGAAATAAGCAGG           | This study |
| LZBS30 | CTCCATTAATTAAGAGAcactACTactATTCTACAAAGAAATCCC     | This study |
| LZBS31 | GGGATTTCTTTGTAGGAATagTAgTttTCTCTTAATTAATGGAG      | This study |

Underlined are the restriction sites incorporated in the primers.

**Table S5.** Plasmids used for BiP *N*-glycosylation study.

| Name   | Description                 | Reference  |
|--------|-----------------------------|------------|
| pRS416 |                             | 3          |
| Ec316  | pRS416-KAR2                 | This study |
| Ec317  | pRS416-KAR2-HA              | This study |
| Ec318  | pRS416-KAR2-A462T-HA        | This study |
| Ec319  | pRS416-KAR2-K530N, S532T-HA | This study |
| Ec320  | pRS416-KAR2-E628T-HA        | This study |
| Ec321  | pRS416-KAR2-A199T-HA        | This study |
| Ec326  | pRS416-KAR2-S405N, G407T-HA | This study |
| Ec330  | pRS416-KAR2-V159N-HA        | This study |
| Ec335  | pRS416-KAR2-I83T-HA         | This study |
| Ec381  | pRS416-KAR2-N81Q-I83T-HA    | This study |
| Ec382  | pRS416-KAR2-N197Q-A199T-HA  | This study |
| Ec383  | pRS416-KAR2-N460Q-A462T-HA  | This study |

**Table S6.** Yeast strains used for BiP *N*-glycosylation study.

| Name            | Genotype                                         | Reference |
|-----------------|--------------------------------------------------|-----------|
| <i>KAR2</i>     | <i>MATa leu2-3,112 ura3-52 ade2-101</i>          | 4         |
| <i>kar2-159</i> | <i>MATa leu2-3,112 ura3-52 ade2-101 kar2-159</i> | 5         |

**Figure S5.** Original gels shown in Fig. 2C

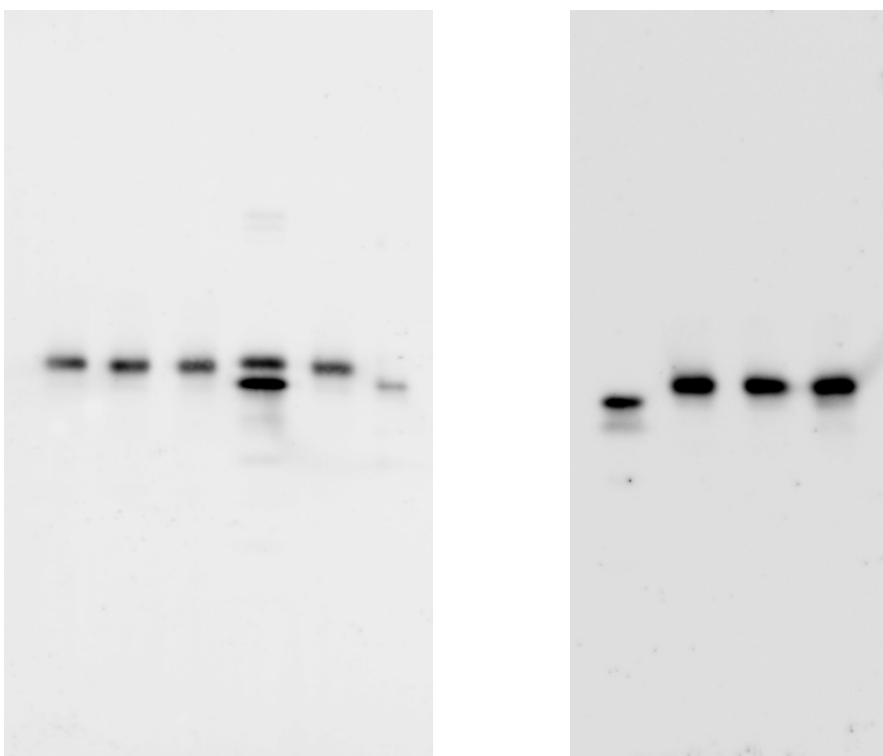

### Supplementary file 1

Classification between SP and NSP of PDB structures employed in this study.

### Supplementary file 2

Buried sequons in gains of *N*-glycosylation mutations associated with human genetic diseases.

## References

1. Fauchere, J. L., Charton, M., Kier, L. B., Verloop, A. & Pliska, V. Amino acid side chain parameters for correlation studies in biology and pharmacology. *Int. J. Pept. Prot. Res.* **32**, 269-278 (1988).
2. Thompson, J. D., Higgins, D. G. & Gibson, T. J. CLUSTAL W: improving the sensitivity of progressive multiple sequence alignment through sequence weighting, position-specific gap penalties and weight matrix choice. *Nucl. Acids Res.* **22**, 4673-4680 (1994).
3. Mumberg, D., Muller, R. & Funk, M. Yeast vectors for the controlled expression of heterologous proteins in different genetic backgrounds. *Gene* **156**, 119-122 (1995).
4. Polaina, J. & Conde, J. Genes involved in the control of nuclear fusion during the sexual cycle of *Saccharomyces cerevisiae*. *Mol. Gen. Genetics* **186**, 253-258 (1982).
5. Scidmore, M. A., Okamura, H. H. & Rose, M. D. Genetic interactions between KAR2 and SEC63, encoding eukaryotic homologues of DnaK and DnaJ in the endoplasmic reticulum. *Mol. Biol. Cell* **4**, 1145-1159 (1993).
